# Supplementary material for: Vacancy-induced high activity of MoS2 monolayers for CO electroreduction: a computational study
Source: Royal Society of Chemistry journal article supplement (doi:10.1039/d1se00988e), 2021-01-01
Supplement: d1se00988e1.pdf [file d1se00988e1.pdf]

## **Vacancy-Induced High Activity of MoS<sub>2</sub> Monolayer for CO Electroreduction: A Computational Study**

Dongxu Jiao,<sup>a</sup> Yu Tian,<sup>c</sup> Yuejie Liu,<sup>b\*</sup> Qinghai Cai,<sup>a,b,d</sup> Jingxiang Zhao,<sup>a,\*</sup>

<sup>a</sup> College of Chemistry and Chemical Engineering, and Key Laboratory of Photonic and Electronic Bandgap Materials, Ministry of Education, Harbin Normal University, Harbin, 150025, China

<sup>b</sup> Modern Experiment Center, Harbin Normal University, Harbin, 150025, China

<sup>c</sup> Institute for Interdisciplinary Quantum Information Technology, Jilin Engineering Normal University, Changchun 130052, China

<sup>d</sup> Heilongjiang Province Collaborative Innovation Center of Cold Region Ecological Safety, Harbin 150025, China

\* To whom correspondence should be addressed. Email: zjx1103@hotmail.com (YL) ;

xjz\_hmily@163.com or zhaojingxiang@hrbnu.edu.cn (JZ) ; Dongxu Jiao and Yu

Tian contribute equally to this work.

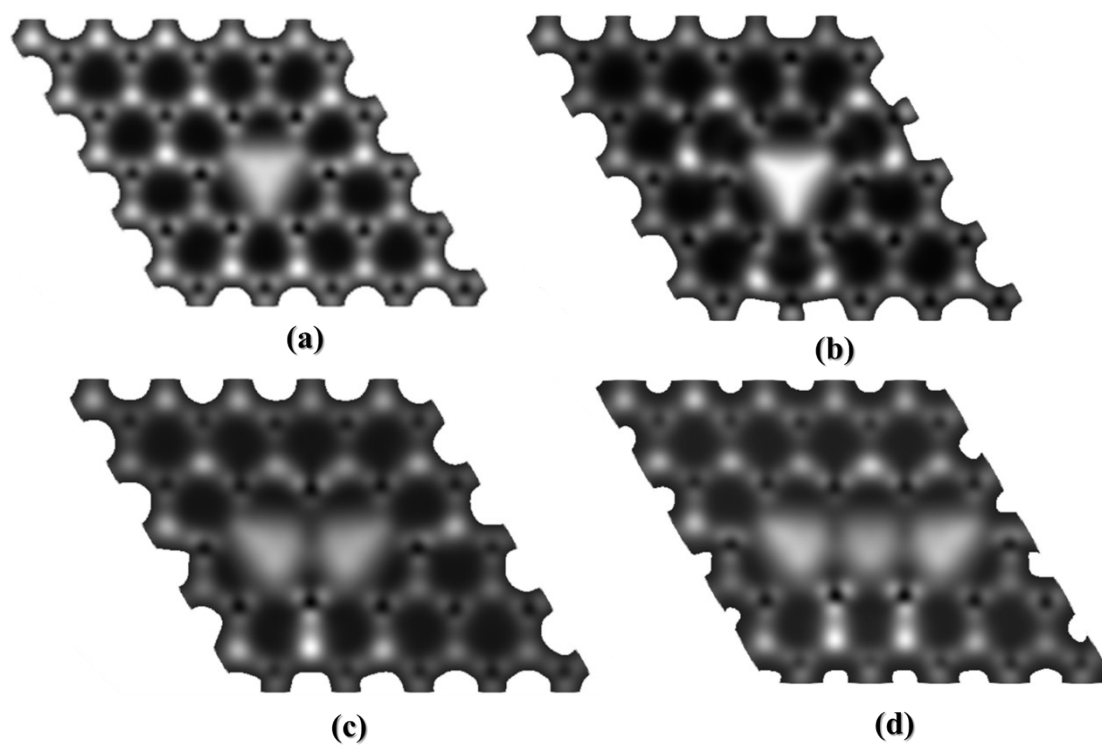

**Fig. S1.** STM image simulation in the constant current mode under a bias voltage of -0.5 V.

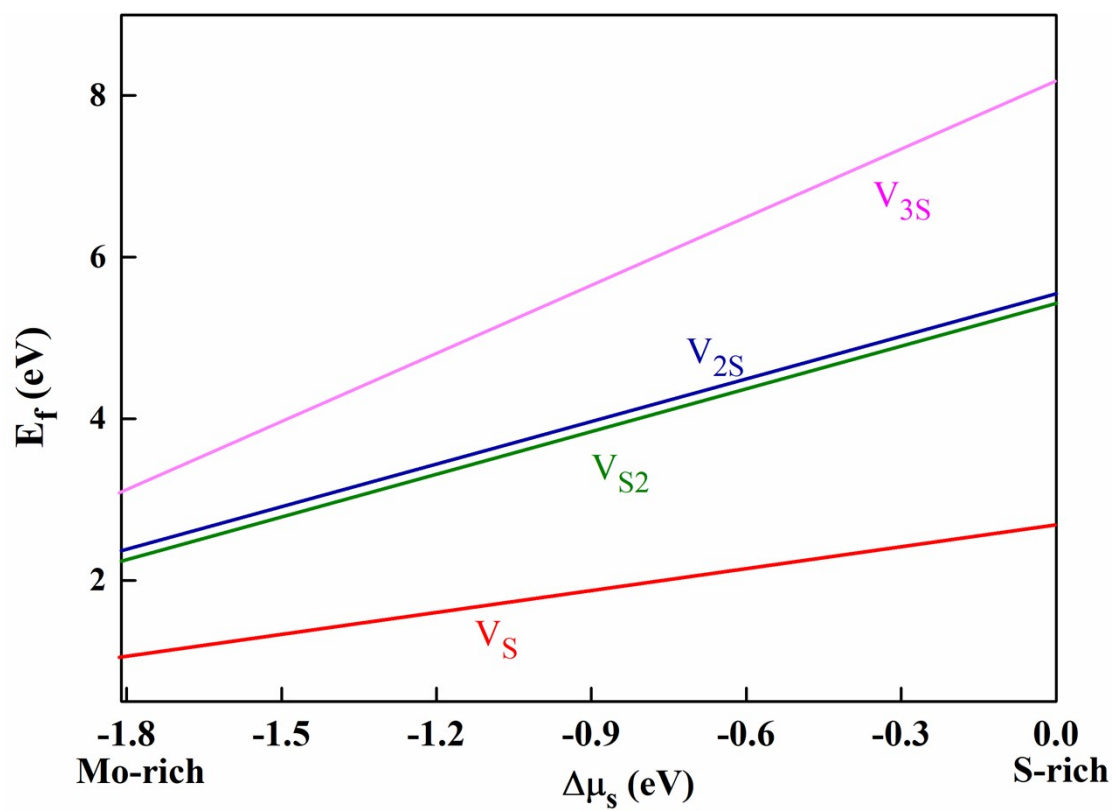

**Fig. S2.** Variation range of the formation energy ( $E_f$ ) of  $V_S$ ,  $V_{S2}$ ,  $V_{2S}$  and  $V_{3S}$ .

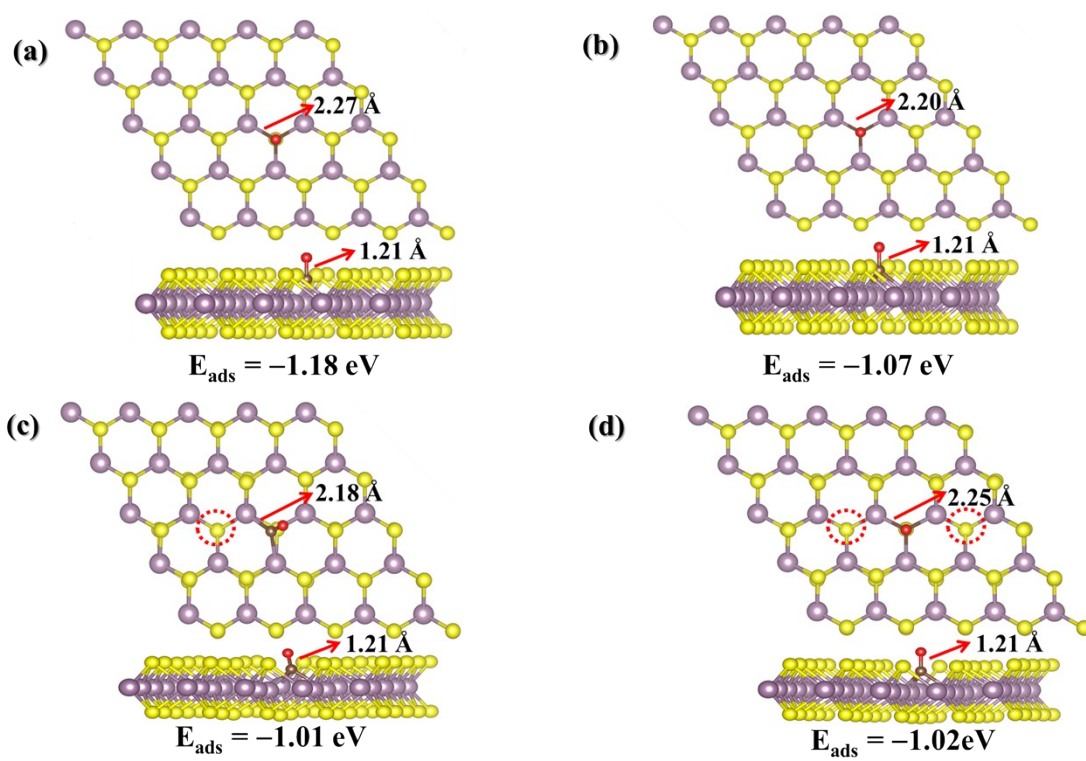

**Fig. S3.** The computed adsorption energies ( $E_{\text{ads}}$ , eV), distances between Mo and C atom ( $d_{\text{Mo-C}}$ ,  $\text{\AA}$ )

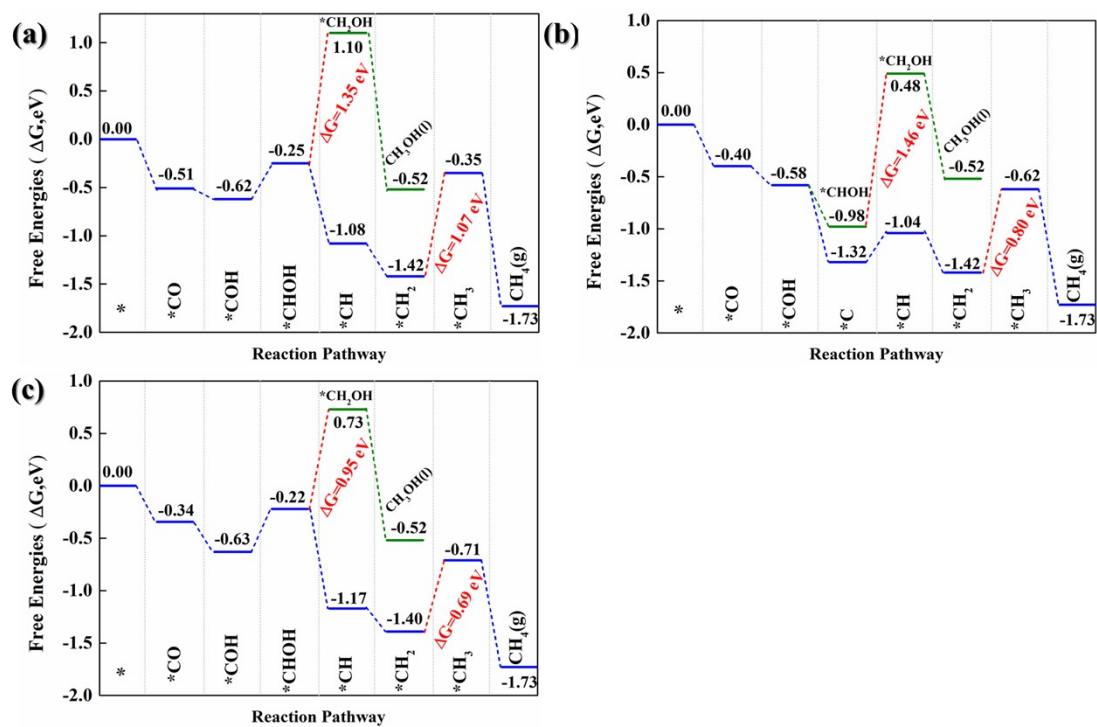

**Fig. S4.** The obtained free energy profiles of COR on (a)  $V_S$ , (b)  $V_{S2}$  and (c)  $V_{2S}$ .

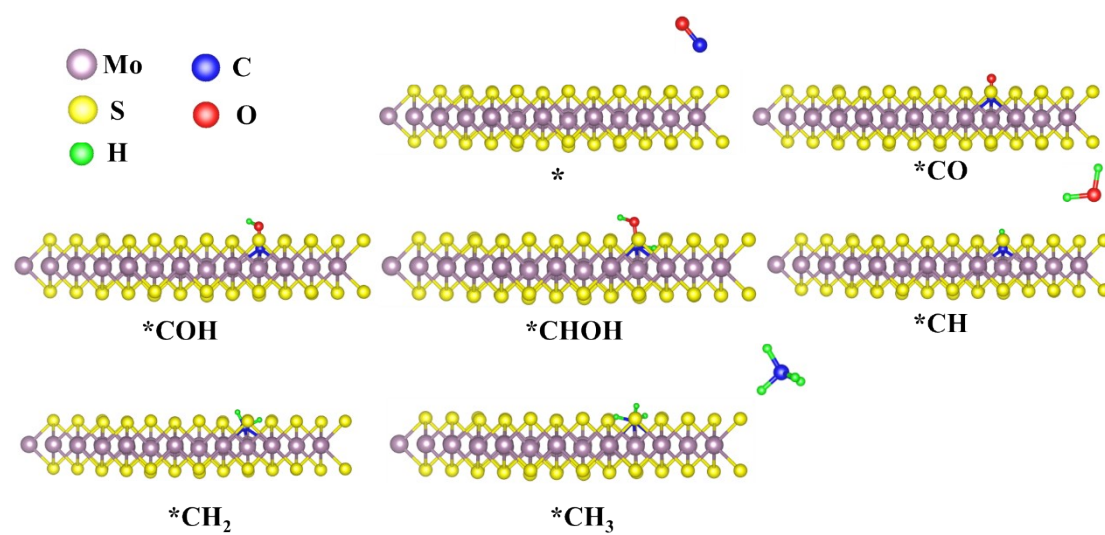

**Fig. S5.** The involved COR intermediates on  $\text{V}_{3\text{S}}$ .

**Table S1.** The computed free energy changes of each possible elementary step during the electrochemical reduction of CO to CH<sub>4</sub> on the V<sub>3</sub>S monolayer.

| Elementary step                                                                                 | Free energy change ( $\Delta G$ ) |
|-------------------------------------------------------------------------------------------------|-----------------------------------|
| $\text{CO (g)} \rightarrow \text{*CO}$                                                          | <b>-0.35</b>                      |
| $\text{*CO} + \text{H}^+ + \text{e}^- \rightarrow \text{*COH}$                                  | <b>-0.26</b>                      |
| $\text{*CO} + \text{H}^+ + \text{e}^- \rightarrow \text{*CHO}$                                  | 0.69                              |
| $\text{*COH} + \text{H}^+ + \text{e}^- \rightarrow \text{*CHOH}$                                | <b>0.39</b>                       |
| $\text{*COH} + \text{H}^+ + \text{e}^- \rightarrow \text{*C} + \text{H}_2\text{O}$              | 0.51                              |
| $\text{*CHOH} + \text{H}^+ + \text{e}^- \rightarrow \text{*CH} + \text{H}_2\text{O}$            | <b>-0.91</b>                      |
| $\text{*CHOH} + \text{H}^+ + \text{e}^- \rightarrow \text{*CH}_2\text{OH}$                      | 1.01                              |
| $\text{*CH}_2\text{OH} + \text{H}^+ + \text{e}^- \rightarrow \text{*CH}_2 + \text{H}_2\text{O}$ | <b>-0.20</b>                      |
| $\text{*CH}_2\text{OH} + \text{H}^+ + \text{e}^- \rightarrow \text{CH}_3\text{OH}^*$            | -1.31                             |
| $\text{*CH}_2 + \text{H}^+ + \text{e}^- \rightarrow \text{*CH}_3$                               | <b>0.63</b>                       |
| $\text{*CH}_3 + \text{H}^+ + \text{e}^- \rightarrow \text{CH}_4 \text{ (g)}$                    | <b>-1.03</b>                      |

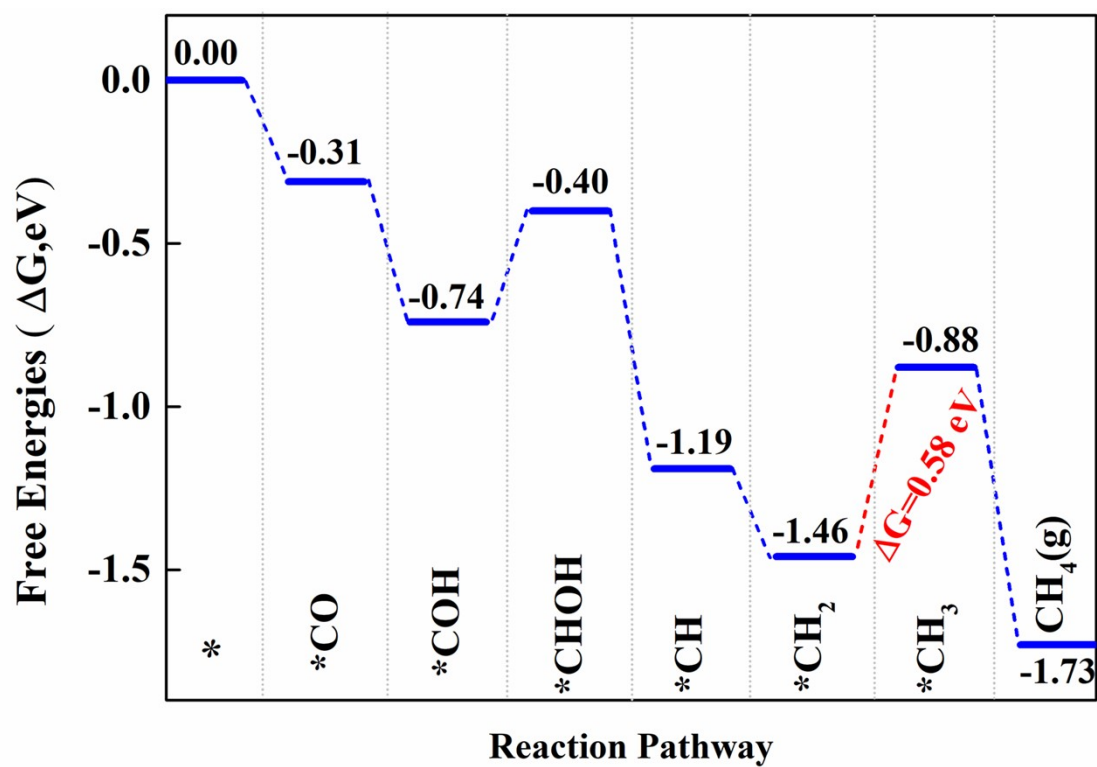

**Fig. S6.** Gibbs free energy ( $\Delta G$ ) diagram for COR on  $V_{3S}$  with solvent effect.

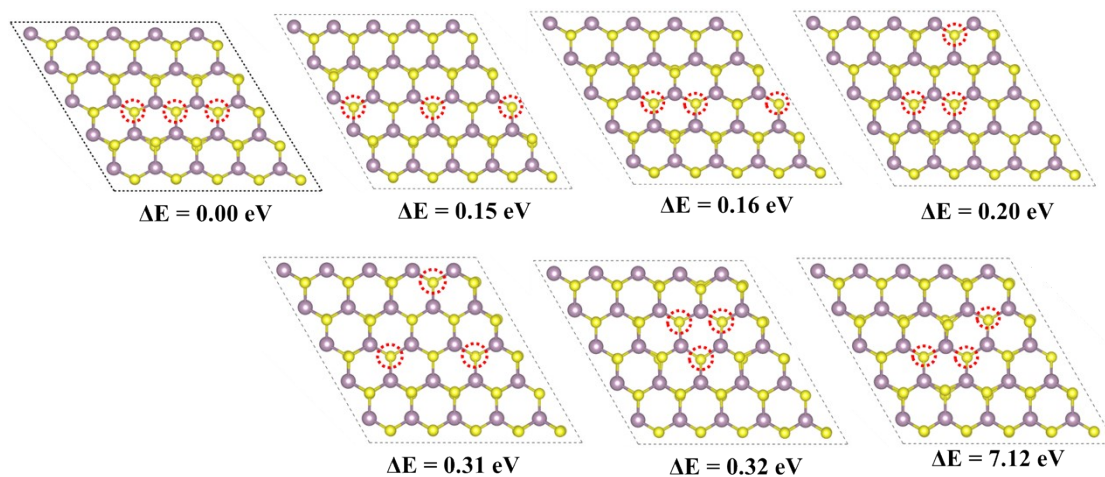

**Fig. S7.** The considered structures of defective MoS<sub>2</sub> monolayers with different three S vacancies and the relative energy differences ( $\Delta E$ ), in which the line defect V<sub>3S</sub> was employed as a reference, and the dotted lines represent S vacancy.

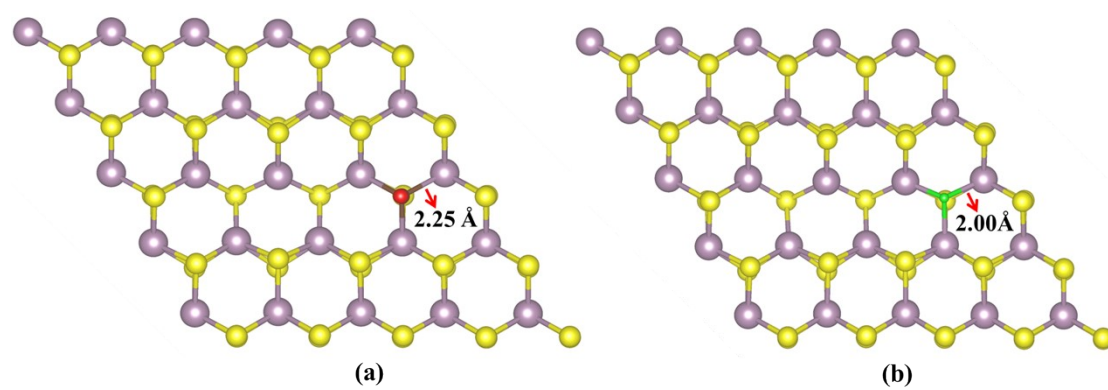

**Fig. S8.** The optimized adsorption configuration of (a) CO molecule and (b) H\* species on V<sub>3</sub>S monolayer.

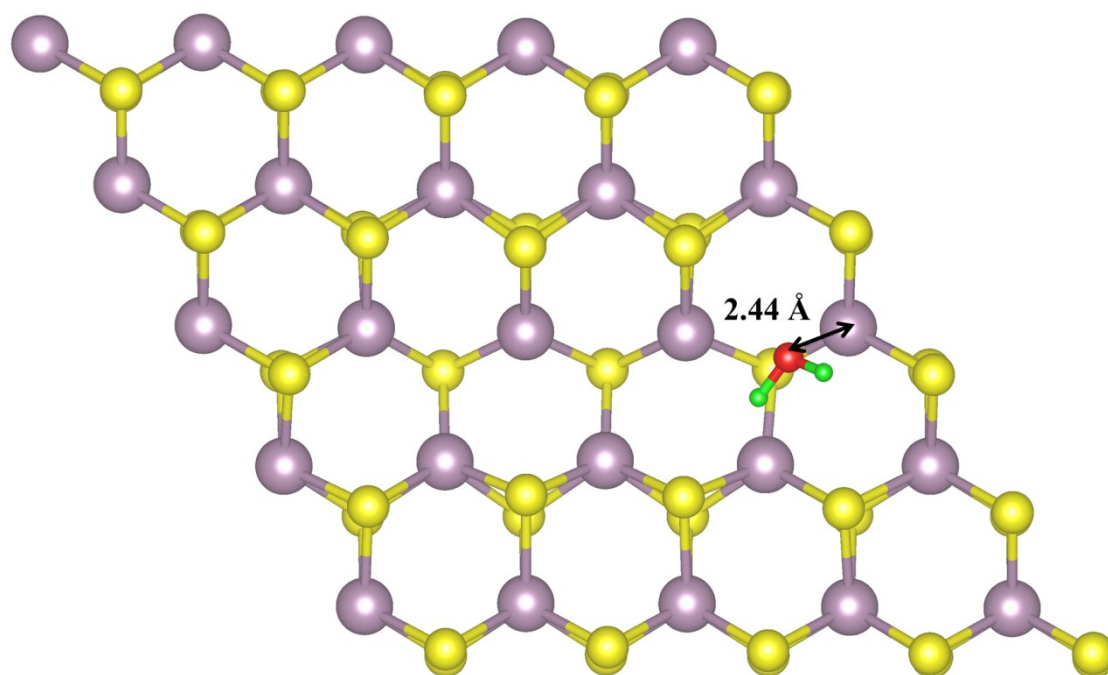

**Fig. S9.** The optimized adsorption configuration of H<sub>2</sub>O molecule on V<sub>3</sub>S monolayer.

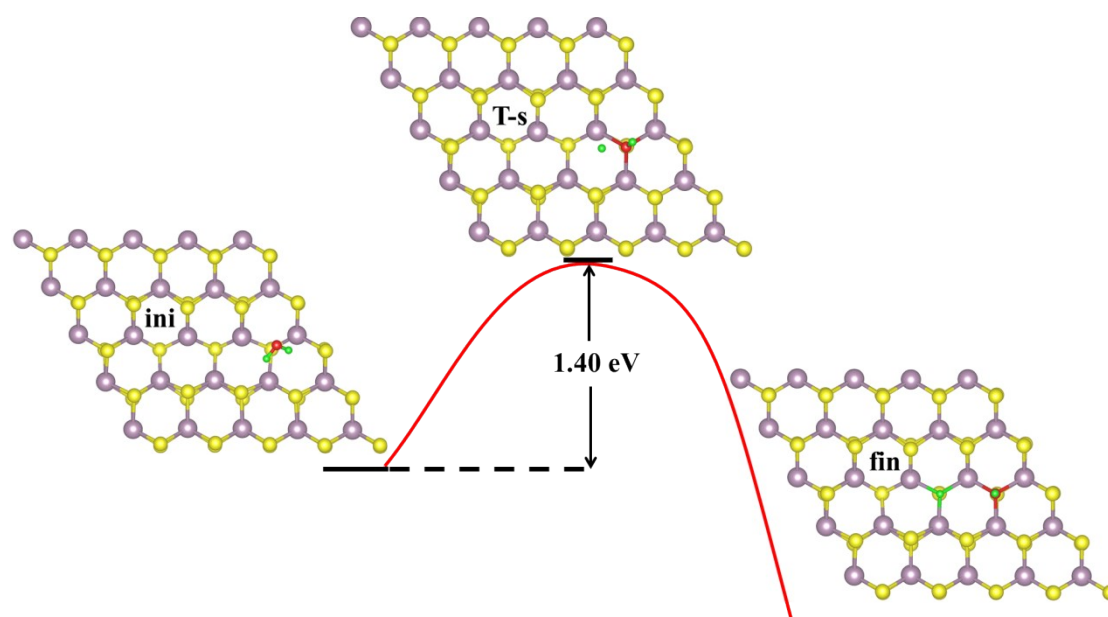

**Fig. S10.** The computed transition state (T-s) for  $\text{H}_2\text{O}$  dissociation on hollow unsaturated Mo sites of the  $\text{V}_{3\text{S}}$  surface.

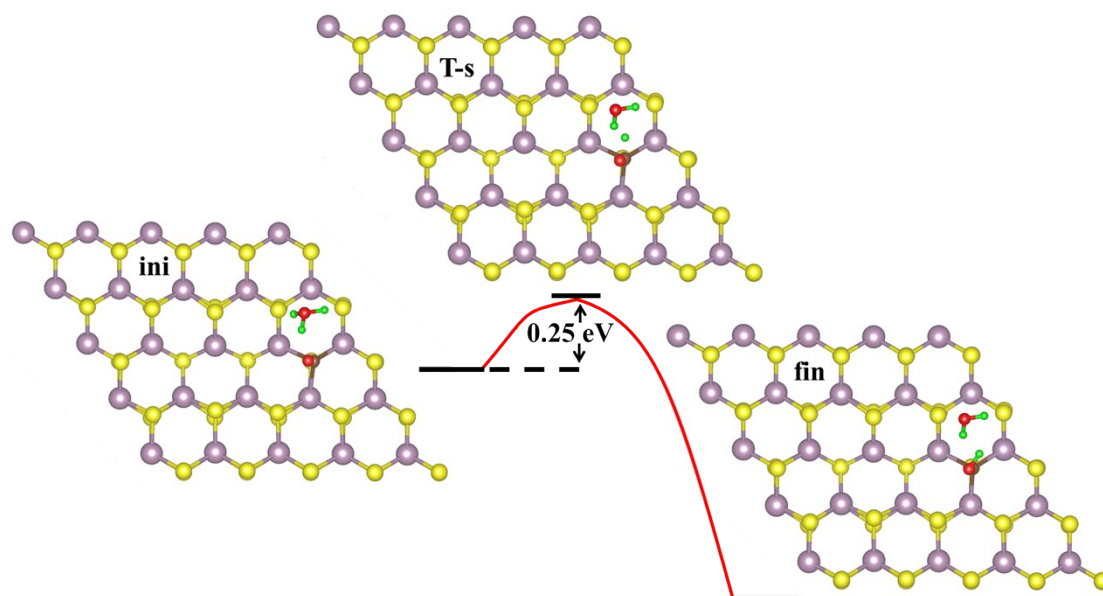

**Fig. S11.** The computed transition state (T-s) for CO hydroenation to  $\text{COH}^*$  via the Heyrovsky-type mechanism on the  $V_{3S}$  surface.
